# Supplementary material for: Short-term outcomes and prognosis of laparoscopy-assisted total gastrectomy in elderly patients with stomach cancer
Source: Springer Nature journal article supplement (doi:10.1007/s00464-019-07338-0), 2020-01-28
Supplement: MOESM1 [file 17602236]

**Supplementary table 1 Univariable analysis of risk factors for postoperative complications**

|  | **Complication (n=49)** | **Non-complication**  **(n=226)** | ***P* value** |
| --- | --- | --- | --- |
| **Gender (n,%)** |  |  | 0.520 |
| Male | 41(83.7) | 180(79.6) |  |
| Female | 8(16.3) | 46(20.4) |  |
| **Age (n,%)** |  |  | 0.742 |
| 65-75 | 10(20.4) | 51(22.6) |  |
| ≥75 | 39(79.6) | 175(77.4) |  |
| **BMI(kg/m2, n,%)** |  |  | 0.599 |
| ＜24 | 36(73.5) | 171(75.7) |  |
| 24-28 | 9(18.4) | 50(22.1) |  |
| ≥28 | 4(8.2) | 5(2.2) |  |
| **Preoperative comorbidity(n,%)** | 22(44.9) | 83(36.7) | 0.286 |
| Hypertension | 18(36.7) | 66(29.2) | 0.299 |
| Diabetes | 2(4.1) | 13(5.8) | 0.641 |
| Pulmonary dysfunction | 2(4.1) | 5(2.2) | 0.451 |
| Cardiology | 7(14.3) | 19(8.4) | 0.202 |
| Neurological dysfunction | 1(2.0) | 13(5.8) | 0.284 |
| Other comorbidities | 0(0) | 3(1.3) | 0.417 |
| **Preoperative blood transfusion(n,%)** | 6(12.2) | 16(7.1) | 0.227 |
| **Previous abdominal surgery(n,%)** | 11(22.4) | 34(15.0) | 0.204 |
| **ASA score(n,%)** |  |  | 0.664 |
| Ⅰ | 0(0) | 1(0.4) |  |
| Ⅱ | 33(67.3) | 137(60.6) |  |
| III | 16(32.7) | 86(38.1) |  |
| Ⅳ | 0(0) | 0(0) |  |
| **TNM stage(n,%)** |  |  | 0.500 |
| ⅠA | 5(10.2) | 28(12.4) |  |
| ⅠB | 4(8.2) | 24(10.6) |  |
| ⅡA | 2(4.1) | 13(5.8) |  |
| ⅡB | 11(22.4) | 49(21.7) |  |
| IIIA | 5(10.2) | 42(18.6) |  |
| IIIB | 14(28.6) | 38(16.8) |  |
| IIIC | 8(16.3) | 32(14.2) |  |
| **Tumor diameter(cm,n,%)** |  |  | 0.154 |
| ≤5 | 32(65.3) | 170(75.2) |  |
| ＞5 | 17(34.7) | 56(24.8) |  |
| **Leukocyte count**(×109/L) | 6.39±2.61 | 5.82±1.88 | 0.156 |
| **Neutrophil** (eut12/L） | 4.24±2.32 | 3.68±1.67 | 0.115 |
| **Lymphocyte**(ymp9/L） | 1.56±0.65 | 1.61±0.62 | 0.590 |
| **Preoperative hemoglobin**（g/L） | 119.20±22.5 | 118.79±22.44 | 0.908 |
| **Serum albumin**(g/L) | 38.52±4.30 | 39.69±4.06 | **0.072** |
| **Serum CEA(ng/ml)** | 9.62±24.13 | 11.02±42.90 | 0.832 |
| **Surgical approach（n,%）** |  |  | **0.061** |
| LTG group | 38（77.6） | 146（64.6） |  |
| OG group | 11（22.4） | 80（35.4） |  |
| **Operation time(min)** | 222.33±67.67 | 213.64±52.89 | 0.324 |
| **Intraoperative blood loss（ml）** | 209.59±249.05 | 145.49±129.33 | **0.086** |

OTG, open total gastrectomy; LTG, laparoscopy-assisted total gastrectomy.
